# Supplementary material for: Success of Aquaculture Industry with New Insights of Using Insects as Feed: A Review
Source: MDPI journal article supplement (doi:10.3390/fishes7060395), 2022-12-17
Supplement: s1 [file s1]

**Table S1:** Patterns of amino acids (mg/g CP) of six commonly used edible insect species. Sources [80,82,152–155]

| Amino Acids   | <i>Acheta domesticus</i><br>(adults/nymphs) | <i>Tenebrio molitor</i><br>(larvae) | <i>Zophobas morio</i><br>(larvae) | <i>Hermetia illucens</i><br>(larvae/prepupae) | <i>Musca domestica</i><br>(Maggot) | <i>Bombyx mori</i><br>(Pupae) |
|---------------|---------------------------------------------|-------------------------------------|-----------------------------------|-----------------------------------------------|------------------------------------|-------------------------------|
| Alanine       | 87.8                                        | 80.2                                | 72.7                              | 62.7                                          | 5.8                                | 5.8                           |
| Arginine      | 65.7                                        | 60                                  | 57.4                              | 52.8                                          | 4.6                                | 5.6                           |
| Aspartic acid | 79.1                                        | 81                                  | 83.1                              | 88.3                                          | 7.5                                | 10.4                          |
| Glutamic acid | 109.2                                       | 112.1                               | 127                               | 103.7                                         | 11.7                               | 13.9                          |
| Glycine       | 52.3                                        | 53.1                                | 48.7                              | 55                                            | 4.2                                | 4.8                           |
| Histidine     | 22.8                                        | 30.2                                | 31.1                              | 32.4                                          | 2.4                                | 2.6                           |
| Isoleucine    | 40.3                                        | 46.1                                | 46.9                              | 43.3                                          | 3.2                                | 5.1                           |
| Leucine       | 78.6                                        | 84.9                                | 80.4                              | 69.9                                          | 5.4                                | 7.5                           |
| Lysine        | 55.3                                        | 55.4                                | 54.6                              | 59.1                                          | 6.1                                | 7                             |
| Methionine    | 15.8                                        | 13.3                                | 12.2                              | 18.8                                          | 2.2                                | 3.5                           |
| Phenylalanine | 31.5                                        | 35.2                                | 37.2                              | 41.5                                          | 4.6                                | 5.2                           |
| Proline       | 56.7                                        | 68.1                                | 55.9                              | 55.4                                          | 3.3                                | 5.2                           |
| Serine        | 44.1                                        | 47.2                                | 44.1                              | 38.3                                          | 3.6                                | 5                             |
| Threonine     | 35.7                                        | 40.3                                | 39.9                              | 39                                            | 3.5                                | 5.1                           |
| Tryptophan    | 7.2                                         | 10.5                                | 11.4                              | 15.1                                          | 1.5                                | 0.9                           |
| Valine        | 54.1                                        | 62.9                                | 60.5                              | 63.8                                          | 4                                  | 5.5                           |

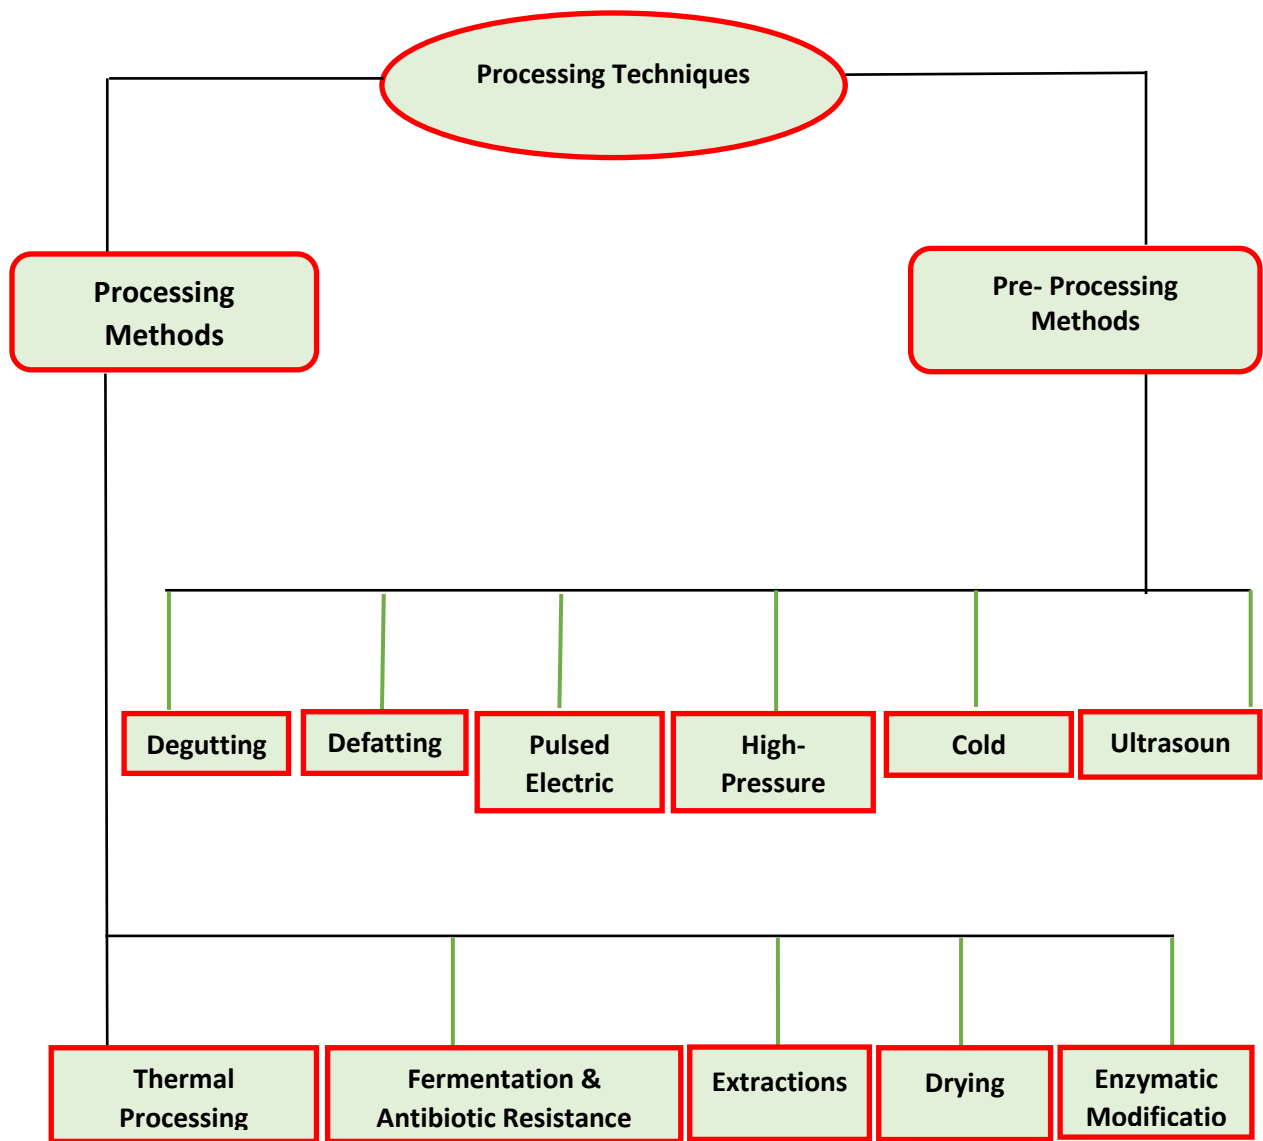

**Figure S1:** The processing techniques of the insect's-based feed.
